# Supplementary material for: Estradiol, Estrone and Ethinyl Estradiol Metabolism Studied by High Resolution LC-MS/MS Using Stable Isotope Labeling and Trapping of Reactive Metabolites
Source: MDPI journal article supplement (doi:10.3390/metabo12100931), 2022-09-30
Supplement: s1 [file s1]

*Supplemental Material*

## **Estradiol, estrone and ethinyl-estradiol metabolism studied by high resolution LC-MS/MS using stable isotope labeling and trapping of reactive metabolites**

**Kahina Chabi , Lekha Sleno \***

**Figure S1.** High-resolution extraction ion chromatograms of oxidative metabolites formed from E2, EE2 and E1 in rat liver microsomal incubations.

**Figure S2.** Extracted ion chromatograms of E2,EE2 and E1 metabolites and adducts trapped by NAC, for their non-labeled and deuterated versions. Some peaks (\*) were increased by 5× for clarity.

**Figure S3.** Extracted ion chromatograms of E2,EE2 and E1 metabolites and adducts trapped by GSH.

**Table S1.** Summary of metabolites and adducts characterized for E1, E2 and EE2 in human and rat liver microsomes, fragments related to the trapping agent are shown in bold.

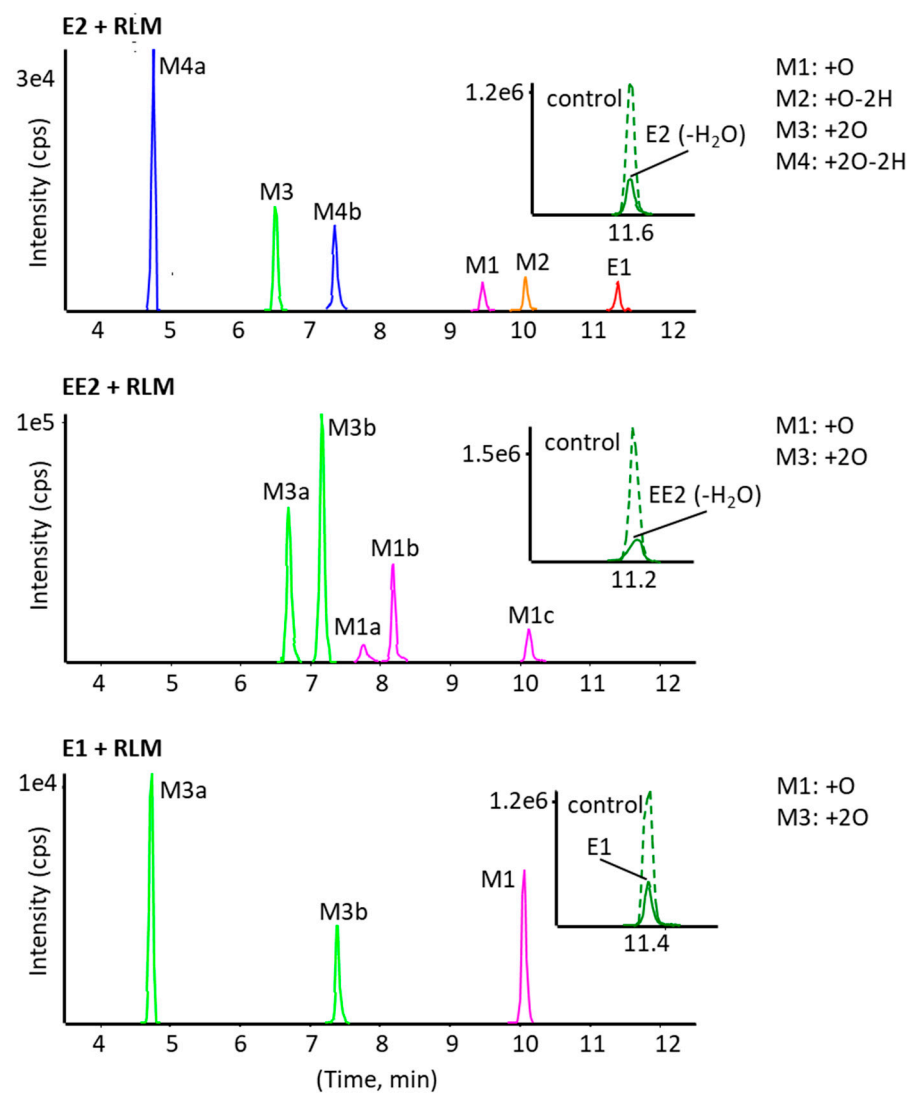

**Figure S1.** High-resolution extraction ion chromatograms of oxidative metabolites formed from E2, EE2 and E1 in rat liver microsomal incubations.

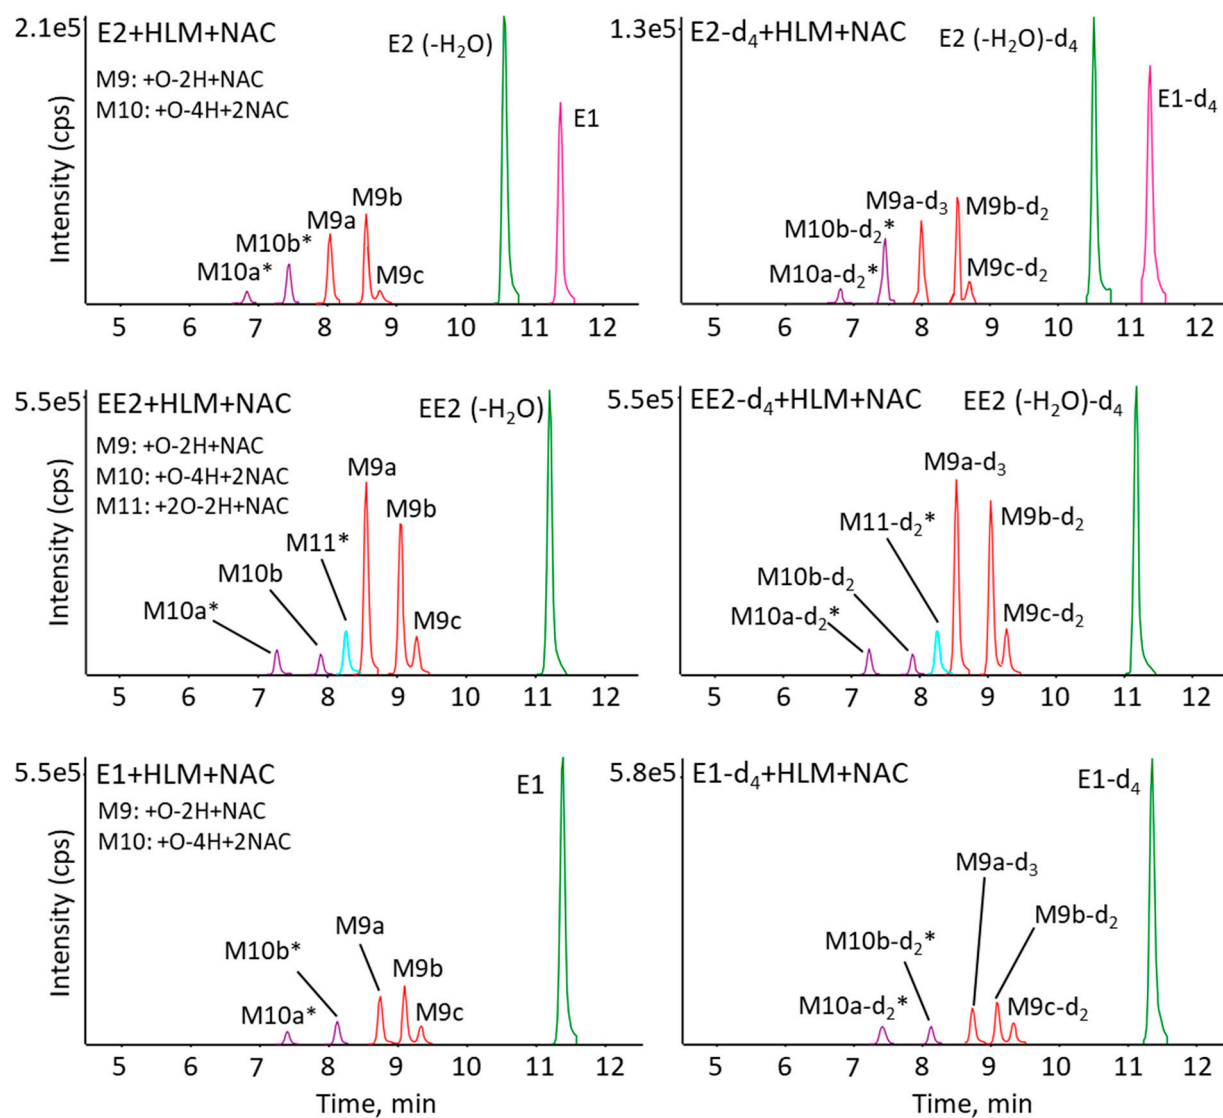

**Figure S2.** Extracted ion chromatograms of E2, EE2 and E1 metabolites and adducts trapped by NAC, for their non-labeled and deuterated versions. Some peaks (\*) were increased by 5× for clarity.

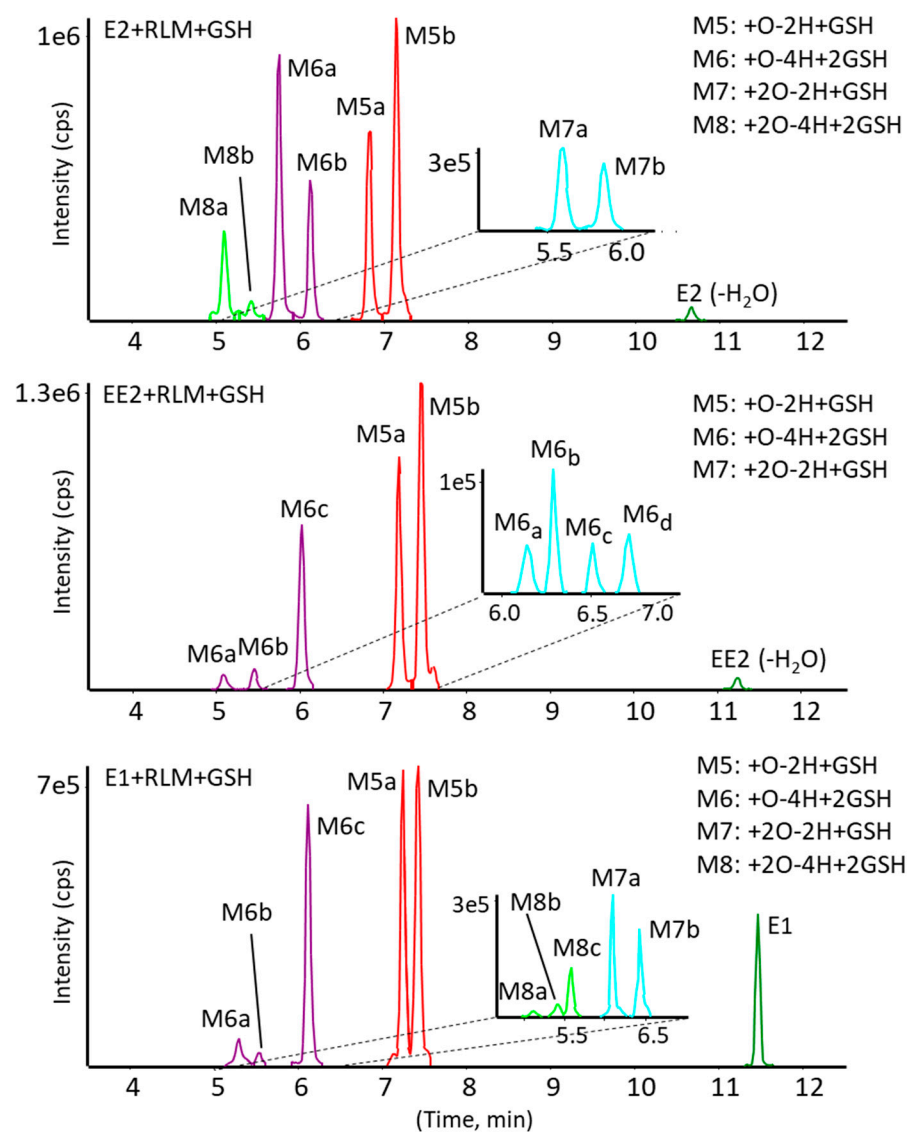

**Figure S3.** Extracted ion chromatograms of E2,EE2 and E1 metabolites and adducts trapped by GSH.

**Table S1.** Summary of metabolites and adducts characterized for E1, E2 and EE2 in human and rat liver microsomes, fragments related to the trapping agent are shown in bold. (continued).

| Biotransformation | Formula                                                                       | RT<br>(min) | Measured <i>m/z</i><br>(ppm) | Selected MS/MS fragments                                                                                  |
|-------------------|-------------------------------------------------------------------------------|-------------|------------------------------|-----------------------------------------------------------------------------------------------------------|
| Estrone (parent)  | C <sub>18</sub> H <sub>22</sub> O <sub>2</sub>                                | 11.4        | 271.1689 (-1.4)              | 253.1588, 223.1103, 197.0960, 185.0957, 173.0959, 159.0801, 157.0645, 145.0643, 141.0696, 133.0646        |
| +O                | C <sub>18</sub> H <sub>22</sub> O <sub>3</sub>                                | 8           | 287.1641 (-0.3)              | 269.1536, 213.0909, 199.0756, 175.0748                                                                    |
|                   |                                                                               | 8.7         | 287.16417 (-0.6)             | 269.1543, 251.1433, 225.1281, 213.1269, 199.1118, 159.0804, 133.0655                                      |
|                   |                                                                               | 10          | 287.1640 (-0.6)              | 269.1531, 229.1218, 213.0907, 199.0750, 161.0592                                                          |
| +2O               | C <sub>18</sub> H <sub>22</sub> O <sub>4</sub>                                | 4.8*        | 303.1584 (-2.1)              | 285.1479, 241.1227, 227.1067, 211.0763, 201.0914, 175.0744, 173.0591, 149.0592                            |
|                   |                                                                               | 7.4*        | 303.1583 (-2.7)              | 285.1490, 267.137, 215.1064, 201.0914, 187.07531, 175.0744, 173.0591, 149.0592                            |
| +O-2H+GSH         | C <sub>28</sub> H <sub>37</sub> N <sub>3</sub> O <sub>9</sub> S               | 7.25        | 592.2309 (-2.4)              | <b>592.2308, 517.1980, 463.1886, 446.1613, 360.1614, 317.1199, 177.0321</b>                               |
|                   |                                                                               | 7.4         | 592.2307 (-2.8)              | <b>517.1988, 463.1880, 446.1620, 360.1621, 317.12, 177.0325, 130.0495</b>                                 |
|                   |                                                                               | 7.6         | 592.2311 (-2.1)              | <b>592.2311, 517.1980, 463.1887, 446.1620, 360.1606, 317.1198, 130.0493</b>                               |
| +2O-2H+GSH        | C <sub>28</sub> H <sub>37</sub> N <sub>3</sub> O <sub>10</sub> S              | 6*          | 608.2278 (0.9)               | <b>608.2278, 590.2174, 533.1953, 479.1851, 462.1581, 376.1576, 333.1153, 177.0320, 130.0494</b>           |
|                   |                                                                               | 6.4*        | 608.2280 (1.2)               | <b>608.2278, 533.1954, 479.1850, 462.1571, 376.1582, 333.1158, 177.0320, 130.0495</b>                     |
| +O-4H+2GSH        | C <sub>38</sub> H <sub>52</sub> N <sub>6</sub> O <sub>15</sub> S <sub>2</sub> | 5.3*        | 449.1550 <sup>+2</sup> (2.4) | <b>590.2176, 515.1816, 461.1743, 308.0910, 233.0594, 179.0485, 162.0216, 130.0494</b>                     |
|                   |                                                                               | 5.5         | 449.1542 <sup>+2</sup> (0.8) | <b>622.1881, 606.1981, 590.2190, 549.1731, 515.1746, 495.1565, 461.1686, 443.1637, 177.0298, 130.0500</b> |
|                   |                                                                               | 6.2         | 449.1540 <sup>+2</sup> (0.3) | <b>622.1859, 493.1454, 384.6317, 177.0327, 130.0496</b>                                                   |
| +2O-4H+2GSH       | C <sub>38</sub> H <sub>52</sub> N <sub>6</sub> O <sub>16</sub> S <sub>2</sub> | 5.6*        | 457.1520 <sup>+2</sup> (1.1) | <b>590.2177, 515.1882, 177.0330</b>                                                                       |
| +O-2H+NAC         | C <sub>23</sub> H <sub>29</sub> NO <sub>6</sub> S                             | 8.7         | 448.1791 (0.5)               | <b>343.1359, 162.0213</b>                                                                                 |
|                   |                                                                               | 9.1         | 448.1789 (0.2)               | <b>406.1671, 343.1364, 162.0216, 130.0492</b>                                                             |
|                   |                                                                               | 9.3         | 448.1786 (-0.6)              | <b>406.1673, 343.136, 162.0214, 130.0490</b>                                                              |
|                   |                                                                               | 7.4         | 609.1930 (-0.8)              | <b>448.1788, 404.1501, 343.1403, 162.0216</b>                                                             |
| +O-4H+2NAC        | C <sub>28</sub> H <sub>36</sub> N <sub>2</sub> O <sub>9</sub> S <sub>2</sub>  | 8.1         | 609.1930 (-0.9)              | <b>591.1823, 504.1518, 448.1780, 285.1483, 162.0216</b>                                                   |

**Table S1.** Summary of metabolites and adducts characterized for E1, E2 and EE2 in human and rat liver microsomes, fragments related to the trapping agent are shown in bold. (continued).

| Biotransformation | Formula                                                                       | RT<br>(min) | Measured <i>m/z</i> (ppm)          | Selected MS/MS fragments                                                              |
|-------------------|-------------------------------------------------------------------------------|-------------|------------------------------------|---------------------------------------------------------------------------------------|
| β-Estradiol       | C <sub>18</sub> H <sub>24</sub> O <sub>2</sub>                                | 10.7        | 273.1850 (0.5)                     | 251.1422, 197.0962, 159.0808, 147.0797                                                |
| β-Estradiol       | C <sub>18</sub> H <sub>22</sub> O                                             | 10.7        | 255.1746 (-H <sub>2</sub> O) (0.9) | 199.1117, 185.0957, 173.0959, 159.0801, 145.0643, 141.0695, 133.0644                  |
| -2H (E1)          | C <sub>18</sub> H <sub>22</sub> O <sub>2</sub>                                | 11.4        | 271.1694 (0.4)                     | 213.1274, 197.0960, 183.0801, 171.0801, 159.0801, 157.0645, 145.0643, 133.0646        |
| +O                | C <sub>18</sub> H <sub>22</sub> O <sub>2</sub>                                | 7.3         | 271.1693(-H <sub>2</sub> O) (0.5)  | 271.1697, 175.0748, 149.0589                                                          |
|                   |                                                                               | 9.5         | 271.1693 (-H <sub>2</sub> O) (0.3) | 271.1696, 175.0746, 161.0593                                                          |
| +O-2H             | C <sub>18</sub> H <sub>22</sub> O <sub>3</sub>                                | 8           | 287.1644 (0.7)                     | 269.1536, 213.0909, 199.0756, 175.0748                                                |
|                   |                                                                               | 10          | 287.1644 (0.6)                     | 269.1531, 229.1218, 213.0907, 199.0750, 161.0592                                      |
| +2O-2H            | C <sub>18</sub> H <sub>22</sub> O <sub>4</sub>                                | 4.8*        | 303.1601 (3.3)                     | 285.1479, 241.1227, 227.1067, 211.0763, 201.0914, 175.0744, 173.0591, 149.0592        |
|                   |                                                                               | 7.4*        | 303.15909 (0.7)                    | 285.1490, 267.137, 215.1064, 201.0914, 175.0744, 173.0591, 149.0592                   |
| +2O               | C <sub>18</sub> H <sub>22</sub> O <sub>3</sub>                                | 6.5*        | 287.1647 (-H <sub>2</sub> O) (1.7) | 269.1544, 243.1389, 227.1066, 187.0756, 175.0760, 173.0597, 149.0598                  |
| +O-2H+GSH         | C <sub>28</sub> H <sub>39</sub> N <sub>3</sub> O <sub>9</sub> S               | 6.8         | 594.2486 (1)                       | <b>594.2488, 576.2376, 519.2174, 465.2066, 319.1372, 301.1263</b>                     |
|                   |                                                                               | 7.15        | 594.2488 (1.4)                     | <b>448.1796, 362.1792, 177.0331, 130.0494</b>                                         |
| +2O-2H+GSH        | C <sub>28</sub> H <sub>39</sub> N <sub>3</sub> O <sub>10</sub> S              | 5.6*        | 610.2426 (-0.5)                    | <b>519.2169, 465.2058, 448.1795, 362.1789, 319.1363, 301.1260, 177.0327, 130.0496</b> |
|                   |                                                                               | 5.9*        | 610.2435 (1)                       | <b>535.2105, 481.2000, 464.1736, 378.1735, 335.1310, 317.1208, 177.0323, 130.0496</b> |
| +O-4H+2GSH        | C <sub>38</sub> H <sub>54</sub> N <sub>6</sub> O <sub>15</sub> S <sub>2</sub> | 5.2         | 450.1626 <sup>+2</sup> (2)         | <b>610.2441, 535.2120, 481.2012, 464.1748, 378.1738, 335.1317, 177.0325, 130.0492</b> |
|                   |                                                                               | 5.75        | 450.1637 <sup>+2</sup> (2.3)       | <b>594.2550, 465.2081, 441.1526, 319.1351, 130.0492</b>                               |
| +2O-4H+2GSH       | C <sub>38</sub> H <sub>54</sub> N <sub>6</sub> O <sub>16</sub> S <sub>2</sub> | 5.1*        | 458.1608 <sup>+2</sup> (1.3)       | <b>624.2043, 606.1940, 594.2486, 465.2013, 549.1765, 495.1604, 177.0334</b>           |
|                   |                                                                               | 5.4*        | 458.1608 <sup>+2</sup> (1.5)       | <b>565.1653, 511.1562, 177.0326, 130.0495</b>                                         |
| +O-2H+NAC         | C <sub>23</sub> H <sub>31</sub> NO <sub>6</sub> S                             | 8           | 450.1951(1.4)                      | <b>592.2262, 517.1979, 446.1625, 345.1478, 177.0322</b>                               |
|                   |                                                                               | 8.6         | 450.1951 (1.3)                     | <b>345.1513, 319.1366, 287.1638, 269.1538, 164.0369</b>                               |
|                   |                                                                               | 8.8         | 450.1941 (-0.9)                    | <b>408.1858, 345.1529, 319.1351, 287.1639, 269.1527, 162.0214</b>                     |
| +O-4H+2NAC        | C <sub>28</sub> H <sub>38</sub> N <sub>2</sub> O <sub>9</sub> S <sub>2</sub>  | 6.8         | 611.2106 (2.3)                     | <b>408.1859, 345.1527, 319.1351, 287.1640, 269.1527, 162.0212</b>                     |
|                   |                                                                               | 7.4         | 611.2092 (0.1)                     | <b>593.2007, 162.0217, 130.0497</b>                                                   |

**Table S1.** Summary of metabolites and adducts characterized for E1, E2 and EE2 in human and rat liver microsomes, fragments related to the trapping agent are shown in bold. (continued).

| Biotransformation        | Formula                                                                       | RT (min) | Measured <i>m/z</i> (ppm)          | Selected MS/MS fragments                                                                                                                          |
|--------------------------|-------------------------------------------------------------------------------|----------|------------------------------------|---------------------------------------------------------------------------------------------------------------------------------------------------|
| <b>Ethinyl-estradiol</b> | <b>C<sub>20</sub>H<sub>24</sub>O<sub>2</sub></b>                              | 11.2     | 297.1847 (-0.7)                    | 185.0956, 145.0638                                                                                                                                |
| <b>EE2</b>               | <b>C<sub>20</sub>H<sub>20</sub>O</b>                                          | 11.2     | 279.1744 (-H <sub>2</sub> O) (0.2) | 264.1502, 251.1430, 223.1116, 185.0960, 173.0959, 159.0803, 145.0645, 141.0695 133.0648                                                           |
| +O                       | C <sub>20</sub> H <sub>22</sub> O <sub>2</sub>                                | 7.8      | 295.1698(-H <sub>2</sub> O) (1.7)  | 277.1599, 251.1433, 235.1129, 197.0959, 171.0802, 159.0798                                                                                        |
|                          |                                                                               | 8.2      | 295.1695(-H <sub>2</sub> O) (0.9)  | 277.1587, 251.1431, 235.1109, 227.1425, 211.1118, 197.0956, 185.0961, 171.0805, 159.0799, 145.0642                                                |
|                          |                                                                               | 10.1     | 295.1695(-H <sub>2</sub> O) (0.8)  | 251.1429, 225.0900, 213.0908, 187.0747, 175.0748, 149.0589                                                                                        |
| +2O                      | C <sub>20</sub> H <sub>22</sub> O <sub>3</sub>                                | 6.7*     | 311.1644 (-H <sub>2</sub> O) (0.6) | 293.1523, 265.1220, 251.1431, 215.1065, 201.0911, 187.0749, 175.07452, 173.0592                                                                   |
|                          |                                                                               | 7.2*     | 311.1645 (-H <sub>2</sub> O) (1.1) | 293.1532, 265.1216, 251.1435, 215.1059, 201.0901, 187.0751, 175.0748, 173.0592,                                                                   |
| +O-2H+GSH                | C <sub>30</sub> H <sub>39</sub> N <sub>3</sub> O <sub>9</sub> S               | 7.2      | 618.2492 (1.9)                     | <b>543.216, 489.2055, 472.1793, 386.1788, 177.0324, 343.1363, 130.0492</b>                                                                        |
|                          |                                                                               | 7.5      | 618.2477 (-0.4)                    | <b>543.2152, 489.2047, 472.1785, 386.1783, 343.1358, 177.0324, 130.0494</b>                                                                       |
|                          |                                                                               | 7.7      | 618.2478 (-0.2)                    | <b>618.2462, 543.2150, 489.2045, 472.1780, 386.1776, 343.1356, 179.0498, 130.0501</b>                                                             |
| +2O-2H+GSH               | C <sub>30</sub> H <sub>39</sub> N <sub>3</sub> O <sub>10</sub> S              | 6.2      | 634.2418 (-1.7)                    | <b>616.2314, 531.2153, 505.1992, 488.1705, 402.171, 385.1458, 359.1315, 341.1175, 308.0896, 181.0323, 177.0325, 162.0216, 130.0493</b>            |
|                          |                                                                               | 6.3*     | 634.2421 (-1.2)                    | <b>616.2314, 559.2091, 505.1989, 488.1712, 402.1715, 385.1467, 359.13, 306.0757, 274.1029</b>                                                     |
|                          |                                                                               | 6.5*     | 634.2423 (-0.9)                    | <b>616.2324, 559.2082, 505.1976, 402.1724, 385.1468, 359.1295, 306.0752, 288.0646, 273.0949, 245.0631, 205.0327, 181.0317, 177.0324, 130.0493</b> |
|                          |                                                                               | 6.7      | 634.2423 (-1)                      | <b>559.2108, 505.1992, 488.1727, 469.1783, 402.1741, 385.1456, 359.1302, 341.1203, 327.1589, 181.0318, 130.0492</b>                               |
| +O-4H+2GSH               | C <sub>40</sub> H <sub>54</sub> N <sub>6</sub> O <sub>15</sub> S <sub>2</sub> | 5.1*     | 462.1624 <sup>+2</sup> (1.5)       | <b>616.2256, 541.1960, 487.1875, 470.1597, 369.1497, 384.1620, 369.1524, 341.1209, 308.0908, 233.0580, 162.0214, 130.0495</b>                     |
|                          |                                                                               | 5.5      | 462.162 <sup>+2</sup> (0.7)        | <b>618.2459, 559.2083, 489.2025, 384.1590, 343.1319, 306.0799, 233.0590, 130.0495</b>                                                             |
|                          |                                                                               | 6        | 462.1622 <sup>+2</sup> (1.2)       | <b>616.2289, 575.1839, 541.1964, 519.1606, 501.1466, 487.1881, 469.1777, 368.1686, 343.1336, 199.0713, 177.0322</b>                               |
| +O-2H+NAC                | C <sub>25</sub> H <sub>31</sub> NO <sub>6</sub> S                             | 8.55     | 474.194 (-1)                       | <b>432.1821, 369.1508, 343.1359, 311.1636</b>                                                                                                     |
|                          |                                                                               | 9.05     | 474.1947 (0.3)                     | <b>432.1829, 369.1512, 343.1364, 311.1639, 293.1537, 162.0212</b>                                                                                 |
|                          |                                                                               | 9.3      | 474.1945 (0)                       | <b>432.1829, 369.1516, 343.1362, 311.1640, 162.0214</b>                                                                                           |
| +2O-2H+NAC               | C <sub>25</sub> H <sub>31</sub> NO <sub>7</sub> S                             | 8.3      | 490.1885 (-1.9)                    | <b>472.1805, 454.1690, 430.1670, 311.1646, 291.1380, 162.0211</b>                                                                                 |
| +O-4H+2NAC               | C <sub>30</sub> H <sub>38</sub> N <sub>2</sub> O <sub>9</sub> S <sub>2</sub>  | 7.3      | 635.2085 (-1.1)                    | <b>474.1959, 430.1672, 369.1585, 291.1372, 162.0213</b>                                                                                           |
|                          |                                                                               | 7.9      | 635.2086 (-0.9)                    | <b>430.1672, 369.1587, 291.137, 162.0213</b>                                                                                                      |
